# Supplementary material for: Interaction between copper and nickel species for electrooxidation of 2,5-bis(hydroxymethyl)furan
Source: Royal Society of Chemistry journal article supplement (doi:10.1039/d3gc03860b), 2024-01-01
Supplement: d3gc03860b1.pdf [file d3gc03860b1.pdf]

## Supplementary Information

### Interaction between copper and nickel species for electro-oxidation of 2,5-Bis(hydroxymethyl)furan

Peiyuan Liu,<sup>‡a,b</sup> Liyuan Huai,<sup>‡a</sup> Bin Zhu,<sup>a,b</sup> Yang Zhong,<sup>a,b</sup> Jian Zhang,<sup>a,b,c,\*</sup>  
Chunlin Chen<sup>a,b,c,\*</sup>

<sup>a</sup> Ningbo 315201, China Ningbo Institute of Materials Technology & Engineering, Chinese Academy of Sciences, 1219 Zhongguan West Road, Ningbo 315201, China.

E-mail: jzhang@nimte.ac.cn, chenchunlin@nimte.ac.cn

<sup>b</sup> University of the Chinese Academy of Sciences, Beijing 100049, China.

<sup>c</sup> Key Laboratory of Bio-based Polymeric Materials Technology and Application of Zhejiang Province, Ningbo 315201, China.

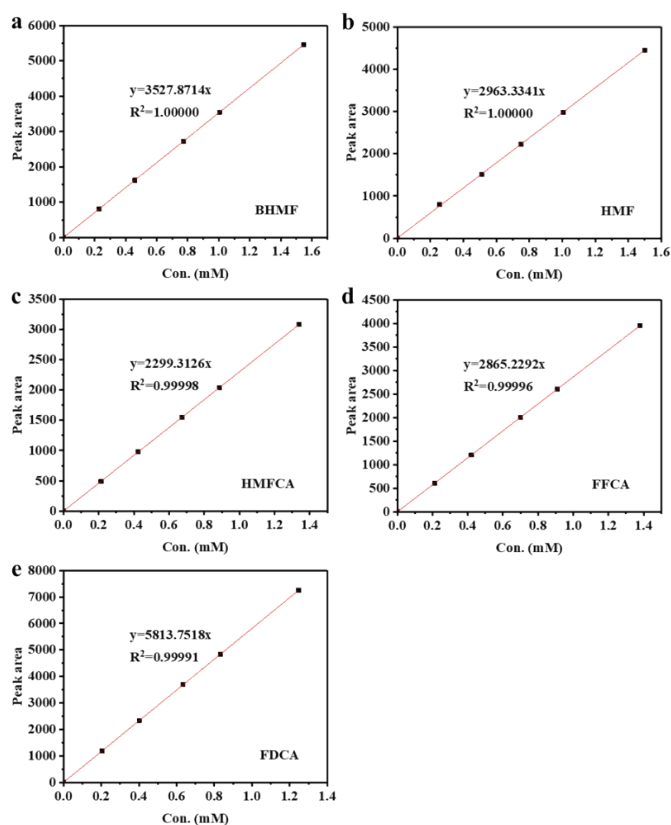

Figure S1. The standard curves of (a) BHMf, (b) HMF, (c) HMFCA, (d) FFCA, (e) FDCA.

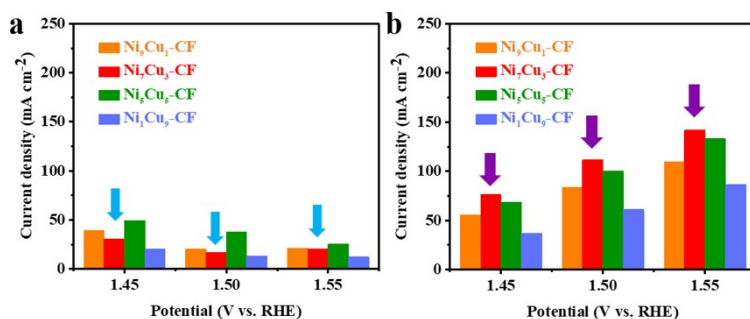

Figure S2. The corresponding current density of  $Ni_xCu_{(10-x)}$  at 1.45 V, 1.50 V and 1.55 V in (a) 1 M KOH or (b) 1 M KOH with 10 mM BHMf.

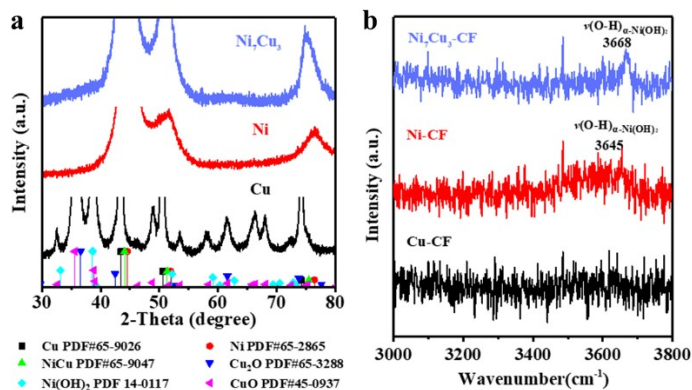

**Figure S3.** (a) The magnified XRD patterns of Cu, Ni and Ni<sub>7</sub>Cu<sub>3</sub> for more detail. (b) The Raman spectra of Cu-CF, Ni-CF and Ni<sub>7</sub>Cu<sub>3</sub>-CF at the high wavenumber side.

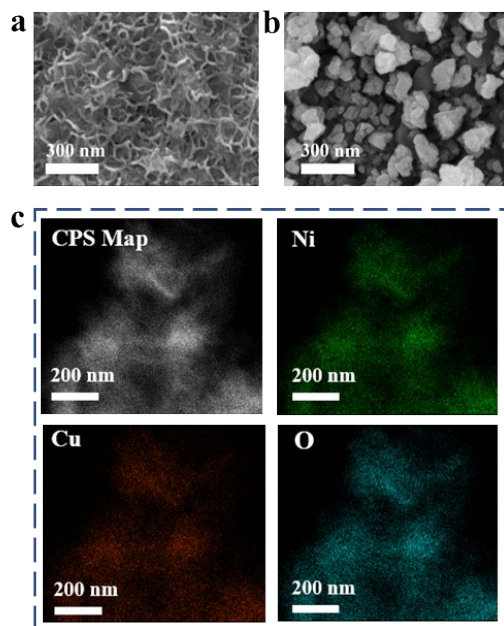

**Figure S4.** (a, b) The SEM images of Ni-CF and Cu-CF. (c) The elemental mapping of Ni<sub>7</sub>Cu<sub>3</sub>-CF.

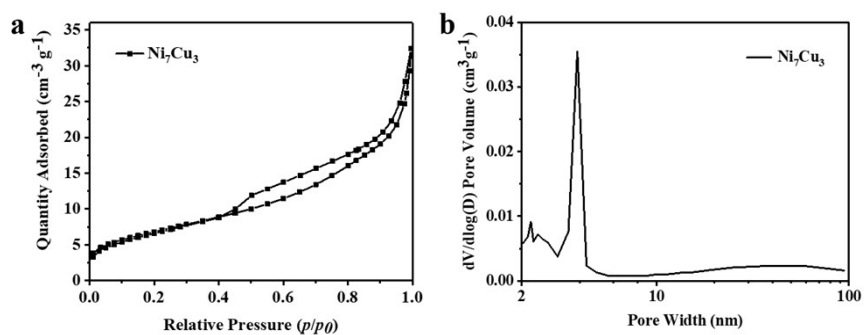

**Figure S5.** (a) The N<sub>2</sub> adsorption-desorption curve and (b) pore size distribution of Ni<sub>7</sub>Cu<sub>3</sub>.

**Table S1.** The elemental ratio in Ni<sub>7</sub>Cu<sub>3</sub>-CF.

| Ni      | Cu      |
|---------|---------|
| mg/g    | mg/g    |
| 363.491 | 266.581 |

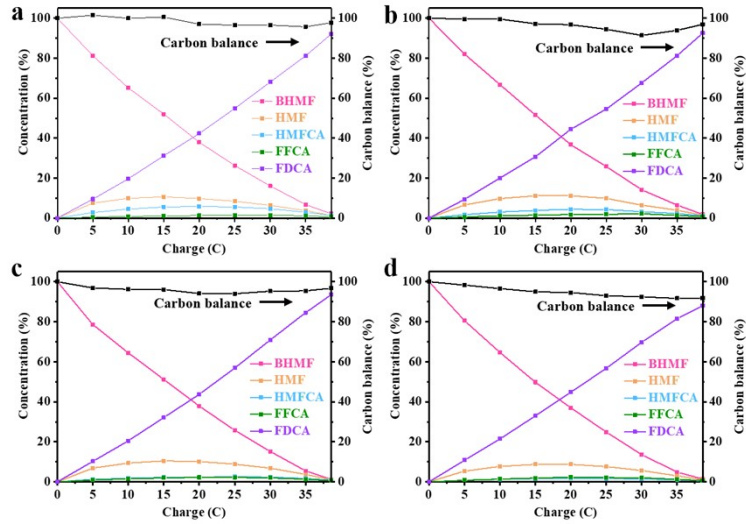

**Figure S6.** The HPLC analysis of solutions electrolyzed at different potentials of (a) 1.43 V, (b) 1.46 V, (c) 1.52 V and (d) 1.55 V vs. RHE. The reactions were carried out with 3-electrode systems in 1 M KOH added with 10 mM BHMf. The black curve was carbon balance.

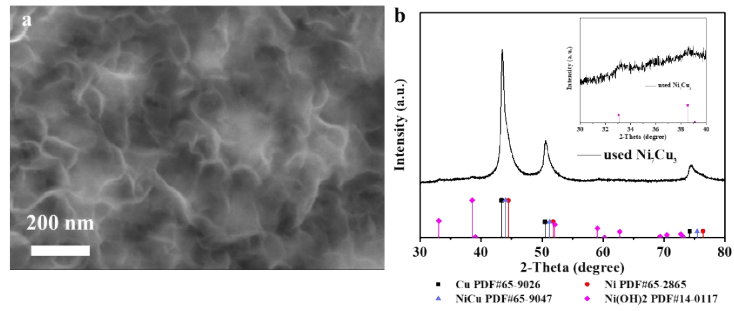

**Figure S7.** The characterization of the used Ni<sub>7</sub>Cu<sub>3</sub>-CF: (a) SEM image. (b) XRD pattern.

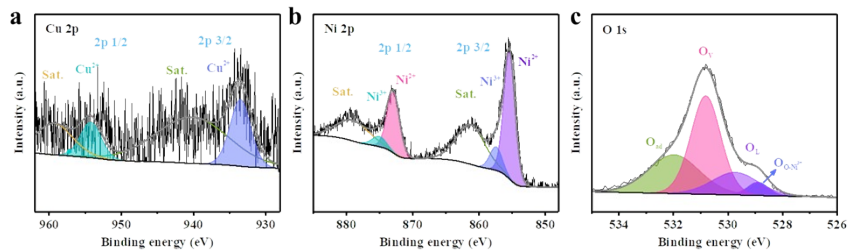

**Figure S8.** XPS of (a) Cu 2p, (b) Ni 2p and (c) O 1s of the used Ni<sub>7</sub>Cu<sub>3</sub>-CF.

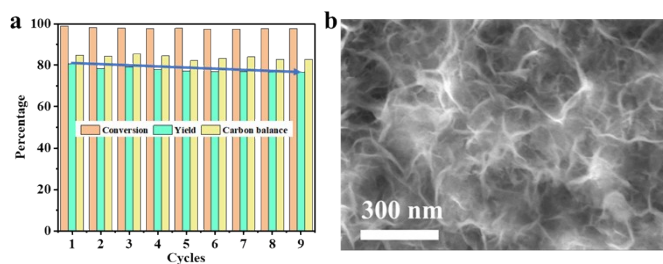

**Figure S9.** (a) The successive electrolysis at Ni-CF and (b) The SEM image of Ni-CF after 9<sup>th</sup> electrolysis.

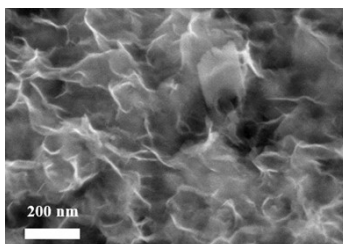

**Figure S10.** The SEM image of the Ni<sub>7</sub>Cu<sub>3</sub>-CF catalyst after 9<sup>th</sup> electrolysis.

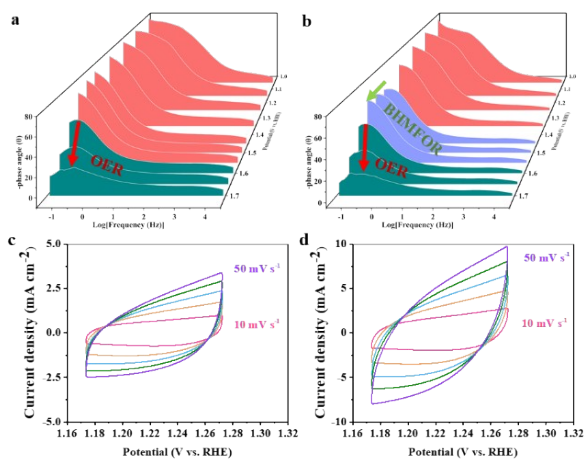

**Figure S11.** The Bode plots in (a) 1 M KOH, (b) 1 M KOH with 10 mM BHMFOR on Cu-CF. (c) The CVs of Ni<sub>7</sub>Cu<sub>3</sub>-CF in 1M KOH. (d) The CVs of Ni<sub>7</sub>Cu<sub>3</sub>-CF in 1M KOH added with 10 mM BHMFOR.

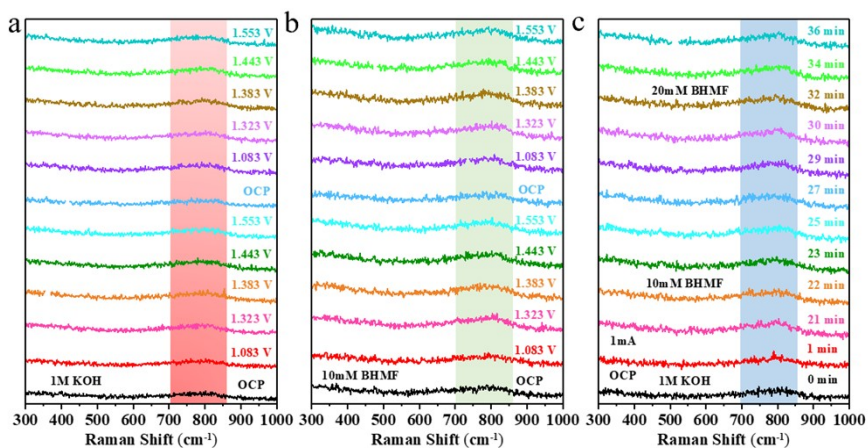

**Figure S12.** The In-situ Raman of Cu-CF under (a) LSV in 1 M KOH, (b) LSV in 1 M KOH added with 10 mM BHMFOR, (c) The chronopotentiometry test at 4 mA cm<sup>-2</sup> in 1 M KOH along with adding 10 mM, 20 mM BHMFOR. The scan rates of LSVs were 5 mV s<sup>-1</sup>.

**Table S2.** Comparison of the catalytic performance in the oxidation of BHMF to FDCA.

| Catalysts                                                  | C <sub>BHMF</sub> | Conditions                        | Potential / voltage | Conv. (%) | Yield (%) | Ref.         |
|------------------------------------------------------------|-------------------|-----------------------------------|---------------------|-----------|-----------|--------------|
| Ni <sub>7</sub> Cu <sub>3</sub> -CF                        | 10 mM             | RT                                | 1.49 V vs. RHE      | 100       | 99.8      | this work    |
| CoOOH/Ni                                                   | 10 mM             | RT                                | 1.6 V               | 100       | 90.2      | <sup>1</sup> |
| NiCo/CF                                                    | 10 mM             | RT                                | 1.4 V vs. RHE       | 100       | 95.4      | <sup>2</sup> |
| Co <sub>3</sub> O <sub>4</sub> /CF                         | 10 mM             | RT                                | 1.65 V              | 100       | 95.8      | <sup>3</sup> |
| Pt/Pb                                                      | 50 mM             | RT                                | 1 V vs. RHE         | 100       | 7         | <sup>4</sup> |
| Pd/o-CNT                                                   | 20 mM             | RT, 100 mL/min O <sub>2</sub>     | -                   | 100       | 93        | <sup>5</sup> |
| Au <sub>m</sub> Pd <sub>n</sub> /N-BN <sub>x</sub> C       | ~9.8 mM           | 100 °C, 2.0 MPa<br>O <sub>2</sub> | -                   | 100       | 95.8      | <sup>6</sup> |
| Au <sub>1</sub> Pd <sub>1</sub> /pBNC-30 %HNO <sub>3</sub> | -                 | 100 °C, 2.0 MPa<br>O <sub>2</sub> | -                   | 94.3      | 35.6      | <sup>7</sup> |
| Ru-Acr(PR)                                                 | 250 mM            | 160 °C                            | -                   | -         | 81        | <sup>8</sup> |

C<sub>BHMF</sub>: the concentration of BHMF; RT: room temperature; Conv.: the conversion of BHMF

### References

- 1 B. Zhu, C. L. Chen, L. Y. Huai, Z. Q. Zhou, L. Wang and J. Zhang, *Appl. Catal. B*, 2021, **297**, 120396.
- 2 J. Liu, B. Zhu, Y. Zhong, S. L. Fan, L. Y. Huai, H. L. Hu, Y. Yang, J. Zhang and C. L. Chen, *Chem. Eng. J.*, 2023, **472**, 144877.
- 3 C. L. Chen, Z. Q. Zhou, J. Liu, B. Zhu, H. L. Hu, Y. Yang, G. X. Chen, M. R. Gao and J. Zhang, *Appl. Catal. B*, 2022, **307**, 121209.
- 4 K. B. Kokoh and E. T. Belgsir, *Tetrahedron Lett.*, 2002, **43**, 229.
- 5 Z. Y. Li, L. Y. Huai, P. P. Hao, X. Zhao, Y. Z. Wang, B. S. Zhang, C. L. Chen and J. Zhang, *Chin. J. Catal.*, 2022, **43**, 793.
- 6 Y. R. Liu, Y. Chen, W. Guan, Y. Cao, F. Wang and Y. L. Zhang, *Catalysts*, 2023, **13**, 435.
- 7 W. Guan, Y. L. Zhang, C. H. Yan, Y. Chen, Y. A. Wei, Y. Cao, F. Wang and P. W. Huo, *ChemSusChem*, 2022, **15**, e202201041.
- 8 S. Kar, Q. Q. Zhou, Y. Ben-David and D. Milstein, *J. Am. Chem. Soc.*, 2022, **144**, 1288.
